# Supplementary material for: Effect of Brief Admission to Hospital by Self-referral for Individuals Who Self-harm and Are at Risk of Suicide: A Randomized Clinical Trial
Source: PubMed Central journal article supplement (PMC6563573; doi:10.1001/jamanetworkopen.2019.5463), 2019-06-07
Supplement: jamanetwopen-2-e195463-s001.pdf [file jamanetwopen-2-e195463-s001.pdf]

1 eAppendix 1. Trial protocol

2

3 **BRIEF ADMISSION SKÅNE: REPLACING GENERAL ADMISSION FOR**  
4 **INDIVIDUALS WITH SELF-HARM AND ACUTE RISK OF SUICIDE.**

5

6 *The Brief Admission Skåne Randomized Controlled Trial (BASRCT)*

7

---

---

8 **Aims:**

9 The overall aim of this study is to determine whether Brief Admission Skåne (BA) can re-  
10 place General Admission (GA) to hospital, for individuals that self-harm at risk for suicide.

11

12 ***Primary Research Question:***

13 1. Can BA replace GA for individuals with self-harm at acute risk for suicide?  
14

15 ***Secondary Research Questions:***

16 2. Can BA increase the individual's level of functioning in activities of daily life?

17 3. Can BA increase the individual's ability to cope effectively with life stress?

18 4. Can BA reduce the individual's global psychiatric symptoms?

19 5. Can BA reduce the frequency of all self-harming behaviours including suicide attempts?

20 6. Can BA reduce the severity of self-harming behaviours?

21 7. Can BA serve as feasible management model in the care of individuals with self-harm, who  
22 may also be at risk for suicide?

23 8. Can the *Five Self-Harm Behaviour Groupings Measure* reliably and validly measure behav-  
24 iors ranging from indirect to direct self-harm and attempted suicide, with varying degree of  
25 frequency and severity?

26

27 **Area overview:**

28 A recent study examining the prevalence of self-harm in psychiatric settings in Sweden, found  
29 that almost half of the individuals currently receiving mental-health services had self-harmed  
30 during the past six months (Odelius & Ramklint, 2014). Of those who had engaged in self-  
31 harming behaviour, more than 90% have had suicidal thoughts during their life-time and more  
32 than every other had at least once during their lives attempted suicide. For a small group of  
33 individuals, acts of self-harm are frequent and risk for suicide is recurrent, prolonged and high  
34 (Lieb, Zanarini, Schmahl, Linehan & Bohus, 2004). Many of these individuals are diagnosed  
35 with Borderline Personality Disorder (BPD).

36 Over the last 20 years several psychotherapeutic interventions have evolved for the treatment  
37 of individuals with self-harm as well as BPD (Lundh, 2014; Stoffers, Völlm, Rucker, Timmer,  
38 Huband & Lieb, 2012). However, when these individuals seek acute admission to hospital due  
39 to a crisis and associated increased suicidal ideation, recommendations for clinical care are  
40 still conflicting. For individuals with any other kind of diagnosis and severe suicidal ideation,  
41 the routine is to offer acute admission to an inpatient unit. However for individuals with re-  
42 current suicidal ideation and self-harm, the risk for iatrogenic effects are considerable, and  
43 long hospital admissions without a clear treatment structure may predict decompensation in  
44 functioning (Lundh, 2013; Lundh 2014). This has resulted in a clinical practice of avoiding  
45 admission for individuals diagnosed with BPD.

46 These two obviously conflicting recommendations can be hazardous for individuals seeking  
47 help due to imminent suicidal crises and provide a regular and ongoing source of stress for  
48 staff at psychiatric emergency wards. They create conflict among all specialized mental health  
49 service providers who share the clinical responsibility to preserve the life of acutely suicidal  
50 individuals at the very moment that smooth transitions from outpatient to inpatient care are  
51 vital. The contradictory recommendations are a regular burden requiring strategic manage-  
52 ment at junctures that would be better suited to the provision of clinical care.

---

53 Brief Admission (BA, Brukarstyrð inlögging) is a model in which the individual seeking psy-  
54 chiatric care can decide themselves when they need hospital admission to prevent decompen-  
55 sation of mental health functioning, including suicidality, for a short period (days) at a maxi-  
56 mum frequency (admissions per month). The model has been used in the Netherlands for  
57 more than 30 years but has not yet been scientifically evaluated in controlled trials.

58 A recently-published review article examined the key elements that are fundamental for effec-  
59 tive short-term admissions of individuals with prolonged suicidality, self-harm or BPD (Hel-  
60 leman, Goossens, Kaaseenbrood, & van Achterberg, 2013). The number of publications in  
61 indexed journals was found to be limited with different study designs, however five key ele-  
62 ments of BA emerged:

63

- 64 1. In advance, a discussion of the goals with the BA. Possible targets with the BA might  
65 be to prevent long-term hospitalization, reducing the number of acts of self-harm/ sui-  
66 cide attempts, to prevent power struggles between individuals seeking care and care  
67 providers, facilitating the return to ambulatory care, and to offer an admission which  
68 does not reduce the individual's autonomy by being unstructured and of unpredictable  
69 or too-lengthy duration.
- 70
- 71 2. To provide a clear admission procedure. Prior to the BA a personal, written agreement  
72 in the form of a contract concerning the time frame and goal of the admissions. In the  
73 reviewed studies possible admissions varied between 3 and 14 days and "refractory  
74 periods" between 14 and 30 days.
- 75
- 76 3. The individual seeking BA should have clear instructions regarding how to predictably  
77 access an admission at the time it is needed.
- 78
- 79 4. Specification of which interventions are accessible and which interventions are not ac-  
80 cessible during the BA. This should be defined in prior to the BA. The type of inter-  
81 ventions varied between studies from conversations with nurse (5 studies) to varying  
82 degrees of assessment and treatment. This specification is also necessary to distinguish  
83 between the BA and a regular clinical admission.
- 84
- 85 5. Five out of ten studies had predefined conditions for premature, involuntary discharge.  
86 These conditions were in all studies, individually-tailored to address the circumstance  
87 of the individual. Such conditions, however, are controversial, since several of those  
88 tested (expression of suicidality, intoxication, self-harm) are signs that the individual  
89 in crisis needs to be taught skills that would reduce reliance on these behaviours which  
90 they themselves often find undesirable (Linehan, 1993).

91

92 A Dutch study examined individuals with BPD and a history of long hospital admissions  
93 (Koekkoek, van der Snoek, Oosterwijk & van Meijel, 2010). Only eleven (N=11) participants  
94 were included. The participants were offered voluntary, planned admissions to hospital over a  
95 period of six months. The amount of days they were offered was estimated from how much  
96 they had been admitted to hospital during the previous six months. The quality of the thera-  
97 peutic relationship was rated by asking the professional to rate the degree of agreement be-  
98 tween participant and professional on content and form of the treatment by using a seven-  
99 point Likert scale with 1 indicating a complete lack of agreement and 7 indicating perfect  
100 agreement. Over the course of the intervention, the ratings increased substantially and signifi-  
101 cantly, and services use decreased substantially, yet not significantly (possibly due to the  
102 small sample size). Participants expressed feeling very content with the intervention.

103

104 Koekkoek (2010) stresses the importance of ensuring that the conditions of the contract and

---

105 aims of the BA are thoroughly discussed with the individual and her/his ambulatory clinician.  
106 This has two purposes - first, the individual needing care feels that the intervention fully is  
107 her/his choice, and thereby increasing responsibility and autonomy, and secondly the collabo-  
108 rative discussions in which the individual's perspective influences decisions about their care  
109 will build the therapeutic alliance (Koekkoek, 2010).

110

111 A Norwegian study included 24 individuals with mixed diagnoses and extensive use of hospi-  
112 tal admission (Støvind, Hanneborg, Ruud, 2012). Eight of the individuals had schizophrenia,  
113 and the remaining participants had affective disorder (n=7), anxiety disorder (n=4), personali-  
114 ty disorder (n=3), substance abuse (n=1) or lacked a diagnosis (n=1). The participants could  
115 themselves decide when they wanted to be admitted to hospital, and stay for durations of up  
116 to five days. After an admission period, they had to be treated in an ambulatory setting for at  
117 least 14 days before they again had the opportunity to choose another five-day admission. The  
118 total number of participants was small and the study made no estimates of significance, but  
119 the number of involuntary admissions was halved, and participants reported feeling more sat-  
120 isfied with their care when brief admissions were included. For participants with schizophre-  
121 nia, the number days of hospital admission did not change with the intervention possibly due  
122 to the course of acute psychosis. However, for the remaining sixteen participants, hospital  
123 admission decreased from 37% of the days during the six months preceding the intervention,  
124 to 13% of the days during the six months of intervention. The frequency of admissions in-  
125 creased, but each admission lasted on average only two to three days.

126

## 127 **Description of the project**

### 128 *Sites:*

129 *Psykiatri Skåne* provides inhabitants in Region Skåne with psychiatric healthcare. Region  
130 Skåne has about 1,3 million inhabitants and is served by four geographically organized psy-  
131 chiatric divisions (Helsingborg, Kristianstad, Lund and Malmö) and two that are organized by  
132 content (Child and Adolescent Psychiatry and Forensic Psychiatry). The geographically based  
133 divisions are served by four inpatient settings (Helsingborg, Kristianstad, Lund and Malmö)  
134 and several ambulatory units. About 3000 people are currently employed at Psykiatri Skåne.  
135 Researchers conducting the study are based in Lund (Sofie Westling, Sophie Liljedahl, Daiva  
136 Daukantaitė and Åsa Westrin) where the administrative center of Region Skåne also is locat-  
137 ed, and in Groeningen, the Netherlands (Marjolein Helleman). The pilot phase of the study  
138 will take place in Lund and Malmö.

139

### 140 *Definitions*

141 *Brief Admission (BA – Brukarstyrd inläggning)* is in this project defined as the specific inter-  
142 vention, standardized by the Brief Admission Skåne Fidelity Measure (BASFM, Bilaga 2b;  
143 Liljedahl, Helleman, Daukantaitė & Westling, 2017). *Brief Admission Skåne (BAS -*  
144 *Brukarstyrd inläggning Skåne)* is the randomized controlled trial evaluating the intervention.

145 *General Admission (GA – Läkarstyrd inläggning)* is defined as all other admissions, voluntary  
146 as well as coercive, to the emergency ward (psychiatric or somatic) due to psychiatric needs  
147 or following an act of self-harm or a suicide attempt, including possible following days with  
148 hospital admission.

149

### 150 *Patient selection criteria*

#### 151 *Inclusion criteria:*

152 - Current episodes of self-harm and/or recurrent suicidality.

- 
- 153 - Fulfilling at least three criteria for Borderline Personality Disorder.  
154 - Admitted to hospital care for at least 7 days or presenting to the psychiatric emergency  
155 department at least 3 times during the last six months.  
156 - Age 18-60 years.

157

158 *Exclusion criteria:*

- 159 - No current ambulatory clinician  
160 - No current place to live (homeless).  
161 - Medical disorder from other organs that significantly contributes to symptoms (e.g. if  
162 self-harm only occurs during episodes of hypoglycemia in a diabetic patient).

163 Testing for autism, attention deficit or learning disabilities exceed the scope of this study.  
164 These diagnoses are not considered to be exclusion criteria, neither are they related in a more  
165 direct way to any of the research objectives. Thus, since the proposed assessments already are  
166 considerably time-consuming (see justification for measures, below), testing for these diagno-  
167 ses is excluded.

168

169 *Methods of evaluation (Figure 1, Bilaga 2c and Bilaga 5a-j)*

170 *Data collected from hospital records*

171 From local hospital records, data is collected concerning:

- 172 – Number of days with general admission to hospital  
173 – Visits at the psychiatric emergency department,  
174 – Whether the admission was voluntary or coercive  
175 – Coercive acts as defined by LPT; 1991:1128: §19, 20, 21, 22, 23 and 24.

176

177 Hospital data are collected monthly retrospectively from twelve months before the interven-  
178 tion start of the pilot and until endpoint after 12 months of the active study period. This gen-  
179 erates quantitative data registered in a form (Bilaga 5a).

180

## 181 **Justification for Measures**

182 The self-report and clinician-administered assessments in this section were included after  
183 careful and repeated consultation within the research group, balancing sensitivity to the needs  
184 of the individuals with the aim to answer the research questions at the core of this study. The  
185 shortest and most concise versions of the measures were selected, and the frequency of as-  
186 sessment intervals (see the Design section below) was specifically chosen to reduce the bur-  
187 den to the individual when completing the measures of the study.

188

189 Included in the protocol are three different self-harm measures, two of which are self-report,  
190 and one that is clinician-administered. Although the same behaviour (self-harm) is ultimately  
191 being queried, both self-report self-harm measures evaluate different, non-overlapping aspects  
192 of the behaviour. The clinician-administered self-harm measure is being validated in this  
193 study for use in clinical samples (Liljedahl & Westling, 2014). It is based upon a broad defini-  
194 tion of self-harm that involves querying self-harm that is direct, indirect, lower-to-higher se-  
195 verity and lower-to-higher lethality, including suicide attempts. If this measure does prove to  
196 be reliable and valid, then future researchers and clinicians can use it rather than self-report  
197 measures based on narrow self-harm definitions that do not reflect the nature of severe and  
198 repetitive self-harm that can and does escalate into suicidal behaviour for some individuals.

199

200 Two additional steps included in this protocol to respond to the sensitivity of individuals in  
201 distress, are:

- 202 1. To ensure that individuals are not left on their own while completing self-report  
203 measures. They will be in the presence of an experienced research nurse who can sup-  
204 port and encourage them to take breaks or discuss any items with which they might  
205 struggle.
- 206 2. To pilot the evaluation measures and the new self-harm measure (5S-HM) with indi-  
207 viduals that have lived experience of self-harm, as well as the significant others in  
208 their lives through the Swedish voluntary organization SHEDO (self-harm and eating  
209 disorders organization: [www.shedo.org](http://www.shedo.org)). Candidates from SHEDO have already  
210 agreed to participate in the piloting of these new measures. Their feedback will be in-  
211 tegrated to the phrasing of the new measures as well as the manner in which they are  
212 administered.

213

#### 214 *Self-report measures/ evaluations*

215 *The Brief COPE* (Carver, 1997) is a self-rating scale that describes coping strategies to handle  
216 stressful situations within the areas of self-distraction, active coping, denial, alcohol/drugs,  
217 use of emotional support, use of instrumental support, behavioural disengagement, venting,  
218 positive reframing, planning, humour, acceptance, religion and self-blame. Each area is cov-  
219 ered by two items (totally 28 items) to which the individual responds on a Likert scale with  
220 four possible answers covering from “I haven't been doing this at all” to “I've been doing this  
221 a lot” (Carver, 1997, attached in Bilaga 5c). The Swedish version of the Brief COPE  
222 (Muhonen & Torkelson, 2005) will be used in the proposed study (Bilaga 5c).  
223

224 *The Difficulties in Emotion Regulation Scale* (DERS; Gratz & Roemer, 2004) is a question-  
225 naire developed to measure difficulties in emotion regulation. It consists of 36 items rating six  
226 different dimensions of emotion regulation. Response items are presented on a Likert scale  
227 with five possible answers ranging from “almost never” to “almost always.” Higher scores  
228 indicate more difficulties. The Swedish version of the DERS (Friberg, 2006) will be used in  
229 the proposed study (attached in Bilaga 5d)  
230

231 *The Inventory of Statements About Self-injury* (ISAS; Klonsky & Glenn, 2009; Glenn & Klons-  
232 sky, 2011) is a self-rating measure on self-harming behaviour (Swedish translation: Lind-  
233 holm, Bjärehed & Lundh, 2011). It contains questions concerning the frequency of 12 differ-  
234 ent forms of self-harm as well as 39 statements about the functions of self-harm, using a  
235 three-point Likert scale, ranging from “0-not relevant,” “1-somewhat relevant,” to “2-very  
236 relevant”. Five additional questions assess descriptive and contextual factors, including age of  
237 onset, the experience of pain during, whether the person is alone or around others when self-  
238 harming, time between the urge to self-harm and the act, and whether the person wants to stop  
239 self-harming.

240

241 *The World Health Organization Disability Assessment Schedule II* (WHODAS 2.0; 2014) is a  
242 self-rating questionnaire developed by the World Health Organization (WHO), in which the  
243 participant responds to 36 questions investigating level of functioning and disability in the  
244 domains of cognition, mobility, self-care, getting along with other people, life activities and  
245 participation in community activities. The questionnaire is undergoing an authorized transla-  
246 tion from English to Swedish conducted by Socialstyrelsen that will be finished during au-  
247 tumn 2014. Cecilia Svanborg and Kristina Brand-Persson ([Cecilia.Svanborg@ki.se](mailto:Cecilia.Svanborg@ki.se) resp. [6](mailto:Kris-</a></p></div><div data-bbox=)



---

248 [tina.Brand-Persson@socialstyrelsen.se](mailto:tina.Brand-Persson@socialstyrelsen.se)) who are responsible for the translation, certify that  
249 there will be no significant deviations in content during the translation from English to Swe-  
250 dish. (Attached is the English version, Bilaga 5b)  
251

252 *Individual's Experience Scale* (IES; Liljedahl, Helleman, Daukantaite & Westling, 2017; at-  
253 tached in Bilaga 5h) is an evaluation form derived from the Brief Admission Skåne Fidelity  
254 Measure (BASFM; Liljedahl, Helleman, Daukantaite & Westling, 2017). The IES is aimed  
255 for the individual receiving BA, and investigates 6 different domains of BA, covered by 31  
256 statements, to which the individual responds using a four-point Likert scale, ranging from 0 –  
257 do not agree at all to 3 - agree completely. The CES is aimed for the clinician, delivering the  
258 BA, and investigates the same six domains of BA, in the same manner but targeting the clini-  
259 cians' experience.

260

261 *Clinician's Experience Scale* (CES; Liljedahl, Helleman, Daukantaite & Westling, 2017; at-  
262 tached in Bilaga 5i) is the second evaluation form derived from BASFM; (Liljedahl, Hel-  
263 leman, Daukantaite & Westling, 2017). The CES is aimed for the clinician, administering BA,  
264 and investigates 6 different domains of BA, covered by 35 statements, to which the individual  
265 responds using a four-point Likert scale, ranging from 0 – do not agree at all to 3 - agree  
266 completely.

267

268 *The Alcohol Use Disorder Identification Test* (AUDIT; Saunders, Aasland, Babor, Dela-  
269 fuente, Grant, 1993; Babor, Higgins-Biddle, Saunders & Monteiro, 2001) is a self-report  
270 questionnaire, developed by the WHO, covering alcohol use patterns and related problems  
271 (total score range 0–40, higher scores indicating a greater degree of risk). It is considered the  
272 gold standard test for screening for alcohol use disorders, is widely used internationally and  
273 has been translated to Swedish (Bergman & Källmén, 2002).

274

275 *The Drug Use Disorders Identification Test* (DUDIT), with proven reliability and validity  
276 (Berman, Bergman, Palmstierna & Schlyter, 2005), measures use of illicit drugs and drug-  
277 related problems (total score range 0–44, higher scores indicating a greater degree of risk,  
278 harm or intensity).

279

280 *The Client Satisfaction Questionnaire* (CSQ; Nguyen, Attkisson, & Stegner, 1983) is one of  
281 the more widely used measures investigating client satisfaction with human services (So-  
282 cialstyrelsen, 2013). We use the 8 items version with score range from 8 to 32, higher values  
283 indicating a higher degree of satisfaction.

284

285 *Five Self-Harm Behaviour Groupings Measure* (5S-HM; Liljedahl & Westling, 2014) is an  
286 instrument developed to assess and grade a wide range of self-harming behaviour, including  
287 direct and indirect self-harm, ranging from lower to higher severity and lethality, both with or  
288 without suicidal intent. Scoring criteria are included, with higher scores indicating greater  
289 severity and frequency of self-harm. Clinical cut-offs will be established over the course of  
290 the pilot phase and the psychometric validity of the measure will be tested based on data col-  
291 lected in this study. (Attached in Bilaga 5f).

292

293 *Fem frågor* (Holmqvist & Nylander, 2013a; Bilaga 5j) is a screening tool to detect develop-  
294 mental cognitive disabilities, such as ADHD, learning disability or autism, in individuals  
295 seeking help for psychiatric symptoms (Holmqvist & Nylander 2013b; Bilaga 5k). Answer

---

296 yes on any of the first four questions or no on question number 5 may be a sign of the pres-  
297 ence of a developmental cognitive disability. This measure is not validated but brief and is  
298 aimed to complement the other diagnostic measures since they do not screen for developmen-  
299 tal disabilities.

300

301 Additional questions are asked on demographics, current psychological and pharmacological  
302 treatment, as well as other interventions and assistance from the municipality.

303

304 *Clinician-administered interviews*

305 *The Mini-International Neuropsychiatric Interview (M.I.N.I. 7.0.0; for Diagnostic and Statis-*  
306 *tical Manual of Mental Disorders, Fifth Edition (DSM-5); Copyright 1992---2014 Sheehan*  
307 *DV; Swedish version personal communication by Allgulander C.). M.I.N.I. 7.0.0 is a short,*  
308 *structured diagnostic interview assessing psychiatric disorders of axis I in DSM-IV and ICD-*  
309 *10. It is widely used and has been validated against Structured Clinical Interview for DSM*  
310 *diagnoses (Sheehan, Lecrubier, Harnett-Sheehan, Janavs, Weiller, Bonara, Keskiner, Schinka,*  
311 *Knapp, Sheehan & Dunbar, 1997) and the Composite International Diagnostic Interview for*  
312 *ICD-10 (Lecrubier, Sheehan, Weiller, Amorim, Bonora, Sheehan, Janavs & Dunbar, 1997).*  
313 *The Swedish version will be used (translation by Allgulander, C Wærn, M., Humble, M.,*  
314 *Andersch, S., Ågren, H.)*

315

316 *Structured Clinical Interview for DSM IV Axis II disorders (SCID II; First, Gibbon, Spitzer,*  
317 *Williams & Benjamin, 1998). SCID II is the most widely used diagnostic measure to deter-*  
318 *mine personality disorders (axis II in DSM IV). It consists of 119 initially self-administered*  
319 *questions to which the respondent can answer yes or no. After the participant has completed*  
320 *the clinician uses the questionnaire as a base for a structured interview revealing if reported*  
321 *symptoms are of clinical significance or not.*

322

323 *Clinical Global Impression Severity (CGI-S; Guy, 1976). In CGI-S the clinician rates the se-*  
324 *verity of the patient's illness according to a seven-point scale where every number is prede-*  
325 *finied and ranging from 1 signifying normal to 7 signifying extremely ill (relative to the clini-*  
326 *cian's past experience with patients who have the same diagnosis). The Swedish version of*  
327 *the scale is not validated (translation: Adler, M., Agestam, M., Bergman, L., Båve, U., Nord-*  
328 *lund, S., Norring, C., Rosenqvist G., 2010) but commonly used when assessing symptom se-*  
329 *verity and treatment response in individuals with mental disorders. (attached in Bilaga 5e).*

330

### 331 ***Study design***

332 The design for this project will be a Randomized Control Trial (RCT), combined with Time-  
333 series (TS; Borckardt et al, 2008). Participants will be randomized at an individual level to  
334 either BA + Treatment as Usual (TAU) or TAU. Block randomization, using tables with ran-  
335 dom numbers with blocks of four, will be used in order to minimize the confounding effect of  
336 changes in general care over time. Randomization will be stratified according to site (i.e.  
337 Lund, Malmö, Kristianstad, Helsingborg). Random number tables will be generated in SPSS.  
338 The data will be handled with Intention to treat (ITT) analysis, so that once participants are  
339 randomized, their data will be included in all analyses regardless of whether they drop-out of  
340 the study prior to its termination.

341

342 Every participant receives a consecutive research number indicating to which site they belong  
343 (Lund – L01-..., Malmö – M01 - ...; Kristianstad – K01-..., Helsingborg – H01-...). The  
344 researcher who is methodologically responsible prepares the randomization lists in four series



---

345 (one per site). The randomization numbers are named according to strata (Lund – LR01-...,  
346 Malmö – MR01 - ...; Kristianstad – KR01-..., Helsingborg – HR01-...). From the lists, a  
347 research nurse prepares four series of consecutively numbered, sealed, opaque envelopes,  
348 each containing information on which group the participant is randomized to. After inclusion  
349 in the study, the research participant is given the envelope to open. After reading, PI handles a  
350 letter containing information on which upcoming procedures for the group to which the par-  
351 ticipant has been randomized. The randomization enveloped is handled back to PI and stored  
352 in a locker, together with the master key.

353 In the master key, PI register the name of the participant in combination with the research  
354 code and the randomization code. Data from forms are collected online, encoded by the re-  
355 search number, and stored on Lund University server. These assessments will be blinded to  
356 researchers analyzing the data. Videos and audio-recordings will be stored on USB in a locker  
357 separate from the master key. Recordings will only be reviewed on computers not connected  
358 to Internet.

359

360 All participants randomized to the intervention during the pilot phase as well as the 10% of  
361 the individuals with the highest number of days admitted to hospital 12 months before base-  
362 line, will be selected for Time-Series Design (TS). The TS will follow an A-B replication  
363 case-series design where the number of days of GA to hospital will be monitored monthly,  
364 retrospectively with data from the local hospital records, from one year ahead of assigning to  
365 the study (A) and during the time the participant is allocated to either BA+TAU or TAU (one  
366 year; B).

367

### 368 **Testing Schedule**

369 For a visual description of the testing schedule, please see Figure 1, Bilaga 2c.

370

- 371 1. Individuals with symptoms suggesting that they may fulfill inclusion criteria, are  
372 asked by any clinician at the current department, if they want to participate in the  
373 study. If the individual is interested in participating, the clinician passes contact in-  
374 formation to the PI.
- 375 2. PI checks if the inclusion criteria seem to be fulfilled and no exclusion criteria.
- 376 3. PI provides written and verbal information about the study, including time for ques-  
377 tions and asks the individual to sign the consent form.
- 378 4. PI registers the participant in the screening log and provides a consecutive research  
379 number.
- 380 5. PI performs assessments with:
  - 381 a. M.I.N.I. 7.0.0 (Sheehan, Lecrubier, Harnett-Sheehan, Janavs, Weiller, Bonara,  
382 Keskiner, Schinka, Knapp, Sheehan & Dunbar, 1997; Lecrubier, Sheehan,  
383 Weiller, Amorim, Bonora, Sheehan, Janavs & Dunbar, 1997)
  - 384 b. SCID II (First, Gibbon, Spitzer, Williams & Benjamin, 1998)
  - 385 c. Fem frågor (Holmqvist & Nylander, 2013a),
  - 386 d. AUDIT (Saunders, Aasland, Babor, Delafuente, Grant, 1993; Babor, Higgins-  
387 Biddle, Saunders & Monteiro, 2001)
  - 388 e. DUDIT (Berman, Bergman, Palmstierna & Schlyter, 2005).
- 389 6. PI provides a consecutively numbered randomization envelope which the participant  
390 opens and signs. This is registered in the randomization log. According to which

---

391 group the participant is enrolled in, a sheet providing information on the study is given  
392 and explained.

393 7. Data collection at baseline by PI:

394 a. For the individuals randomized to the control group, data from hospital records  
395 for the previous 12 months, and CGI-S (Guy, 1976), are recorded with baseline  
396 date on the day for the randomization.

397 b. For individuals randomized to the intervention group data from hospital rec-  
398 ords and CGI-S (Guy, 1976), are recorded with baseline date on the day for the  
399 contract (i.e. day when BA is accessible).

400 8. Data collection at baseline by a Research Assistant (RA):

401 a. After randomization PI contacts a local RA who schedules an appointment  
402 with all participants, and administers a link to the self-administered forms:

403 i. 5S-HM (Liljedahl & Westling, 2014),

404 ii. WHODAS 2.0 (WHODAS 2.0; 2014),

405 iii. Brief COPE (Carver, 1997; Muhonen & Torkelson, 2005), DERS  
406 (Gratz & Roemer, 2004; Friberg, 2006),

407 iv. ISAS (Klonsky & Glenn, 2009; Glenn & Klonsky, 2011; Lindholm,  
408 Bjärehed & Lundh, 2011) .

409 b. RA is available for the individual and provides help if necessary, when com-  
410 pleting the forms online.

411 c. For individuals randomized to the intervention group RA further contacts their  
412 primary clinician as well as ward staff at the ward providing BA, to schedule  
413 an appointment for negotiation resulting in a BA contract. At the end of the  
414 negotiation IES and CES (negotiation part) are completed online.

415 9. Datacollection as 6 and 12 months ( $\pm$ 2 weeks) is repeated as baseline, with the  
416 change that the contract negotiation is replaced by contract evaluation for the interven-  
417 tion group and data from hospital records is collected from the previous 6 months.

418

419 ***Pilot phase***

420 The first three months of the study (Sept, 2015 – Jan, 2016) will form a pilot phase with the  
421 goal of optimizing the intervention, evaluate the inclusion and exclusion criteria and prelimi-  
422 nary testing to determine whether the quality and quantity of assessments are adequate and  
423 feasible. At the termination of the pilot phase evaluation with IES and CES (Liljedahl, Hel-  
424 leman, Daukantaite & Westling, 2017) will be performed.

425 Data collection will be suspended from January to March, 2016. During this phase all audi-  
426 otaped sessions will be transcribed, translated and evaluated by the authors of the BASFM  
427 (Bilaga 2b; Liljedahl, Helleman, Daukantaite & Westling, 2017), Sophie Liljedahl and  
428 Marjolein Helleman. Feedback from the evaluation measures (the IES and CES, Liljedahl,  
429 Helleman, Daukantaite & Westling, 2017) will be extracted and reviewed by the senior re-  
430 searchers in this study to determine whether the content or procedures are functioning as an-  
431 ticipated, and to determine whether there are any areas in need of improvement. Any substan-  
432 tial changes to any aspect of the study or its measures will be sent to the Regional Ethics  
433 board (EPN Lund) for review. Data collection for the active phase of the study will start be-  
434 tween March 2016 (baseline) and terminate 36 months after.

435

436 ***Intervention and Treatment as Usual (TAU):***

---

---

437 Participants randomized to TAU will receive no intervention from the study protocol, except  
438 the baseline assessments and repeated assessments administered on the same schedule as de-  
439 scribed above for the treatment group. They will not be given the evaluation measures that are  
440 specific to the BA intervention (the IES and the CES; Liljedahl, Helleman, Daukantaite &  
441 Westling, 2017)

442

443 For a detailed description of the BA please see the *Brief Admission: Manual for training and*  
444 *implementation developed from the Brief Admission Skåne Randomized Controlled Trial*  
445 (Liljedahl, Helleman, Daukantaite & Westling, 2017). Participants randomized to BA + TAU  
446 will have an initial, scheduled meeting with their ambulatory clinician and the local RA who  
447 also functions as the nurse clinician as described in the BASFM (Liljedahl, Helleman,  
448 Daukantaite & Westling, 2017). During this meeting the participant receives further infor-  
449 mation on BA. This meeting comprises a negotiation process as standardized in the BASP  
450 with the goal of integrating the intervention in the individual's treatment plan. The meeting  
451 results in the BA contract, signed by the participant, their ambulatory clinician and the local  
452 RA (attached in Bilaga 4c). The ambulatory clinician stays responsible for the treatment and  
453 the RA becomes the contact person to bridge the gap between ambulatory care and the BA.

454

455 A defining feature of the BA is that the participant decides for themselves regarding whether  
456 and when to initiate a brief hospital admission, at most three times per month, and for a max-  
457 imum of three consecutive days. BAs can be initiated between 8AM and 8PM every day dur-  
458 ing the week. The procedure for the BA is defined in the BASP. If the needs of the client ex-  
459 ceed the level of service offered during BA, GA should be considered.

460 The intervention will last for 12 months and the participant will evaluate the intervention at  
461 the end of each BA and the contract after 6 and 12 months according to the procedure as de-  
462 scribed in BASFM (Bilaga 2b; Liljedahl, Helleman, Daukantaite & Westling, 2017). Partici-  
463 pants randomized to the BA condition have access to the same security procedures as they do  
464 when receiving Treatment as Usual (TAU).

465 No risks to the well-being of the participant are expected, exceeding those found with TAU.  
466 Normal security routines are therefore sufficient. Data collection will start in September 2015  
467 for the pilot phase of the study, and evaluated at the end of January 2015.

468

#### 469 ***How is the choice of methods related to the Research Objectives?***

- 470 1. Can BA replace GA for individuals with self-harm and acute risk for suicide?  
471 – Outcome is data from medical records.  
472
- 473 2. Can BA increase the individual's level of functioning in activities of daily life?  
474 – Outcome is data from WHODAS 2.0. (World Health Organization, 2014).  
475
- 476 3. Can BA increase the individual's ability to cope effectively with life stress?  
477 – Outcome is data from Brief COPE (Carver, 1997) Swedish version of the Brief  
478 COPE (Muhonen & Torkelson, 2005) and DERS (Gratz & Roemer, 2004); Swe-  
479 dish version of the DERS (Friberg, 2006).  
480
- 481 4. Can BA reduce the individual's global psychiatric symptoms?  
482 – Outcome is data from estimation according to CGI-S (Guy, 1976).  
483
- 484 5. Can BA reduce the frequency of all self-harming behaviours including suicide at-  
485 tempts?

- 
- 486 - Outcome is data from questionnaire 5S-HM (Liljedahl & Westling, 2014)  
487 and ISAS (Klonsky & Glenn, 2009; Glenn & Klonsky, 2011; Lindholm, Bjärehed &  
488 Lundh, 2011).
- 489 6. Can BA affect the severity of self-harming behaviours including suicide attempts?  
490 – Outcome is data from questionnaire 5S-HM (Liljedahl & Westling, 2014).  
491
- 492 7. Can BA serve as a feasible management option in the care of individuals with self-  
493 harm who may also be at risk for suicide?  
494 – Outcome is data from IES and the CES (Liljedahl, Helleman, Daukantaite &  
495 Westling, 2017) completed by the participants and clinicians administering  
496 BA after pilot testing, 6 and 12 months  
497
- 498 8. Can the *Five Self-Harm Behaviour Groupings Measure* (5S-HM: Liljedahl & Wes-  
499 tling, 2014) reliably and validly measure behaviors ranging from indirect to direct self-  
500 harm and attempted suicide, with varying degree of frequency and severity?  
501 – Outcome is data from questionnaire 5S-HM (Liljedahl & Westling, 2014), ISAS  
502 (Klonsky & Glenn, 2009; Glenn & Klonsky, 2011); Swedish version of the ISAS  
503 (Lindholm, Bjärehed & Lundh, 2011) and DERS (Gratz & Roemer, 2004); Swe-  
504 dish version of the DERS (Friberg, 2006).  
505  
506

507 ***Required sample size and a priori power analyses***

508 G\*Power, 3. 1. 7 (Faul, Erdfelder, Lang, & Buchner, 2007) was used to calculate a priori  
509 power for analyzing main effects and interaction for an A X B mixed design where A is a  
510 between-subject factor with two levels (experimental and control groups) and B is a within-  
511 subjects factor with three levels (three repeated assessments). The main statistical analyses  
512 will be either mixed (within-between) Analysis of Variance (ANOVA) or Analysis of Covari-  
513 ance (ANCOVA), controlling for baseline. Simpler univariate analyses will be calculated, but  
514 the power analyses summarized here are for the ANOVA model.  
515

516 Assuming that three effects (i.e., between levels of the factor A, within levels of the factor B  
517 and within-between interaction A X B), are of medium size ( $f = 0.25$ ; see Cohen, 1988), a  
518 significance level is of  $\alpha = .05$ , and the power values of the  $F$  tests are .85, a total of  $N = 98$   
519 per treatment site must be recruited ( $n=196$  including both Stockholm and Lund, whose data  
520 will be grouped and analyzed separately).

521 Attrition in this population based on previous studies has been estimated to be approximately  
522 25% (Stoffers, Völlm, Rucker, Timmer, Huband & Lieb, 2012; Nadort, Arntz, Smit, Giesen-  
523 Bloo, Eikelenboom, Spirnhoven, van Asselt, Wensing, & van Dyck.,2009). In order to at-  
524 tain the required sample size for these power estimates, including expected attrition, a total of  
525 of  $N= 124$  participants is required, with  $n=62$  participants in each group (treatment and con-  
526 trol).

527

528 **Significance:**

529 Although individuals diagnosed with Borderline Personality Disorder (BPD), with recurrent  
530 risk for self-harm and suicide, frequently seek help in psychiatric care, there is no consensus  
531 regarding how to they are best treated when in crisis with high risk for suicide. As is the na-  
532 ture of individuals diagnosed with BPD or those with pervasive emotion dysregulation, sui-  
533 cidality has been described as “chronic” (Linehan, 1993). Accordingly, an evidence-based  
534 model of managing suicidal crises will be a significant contribution to the care of these indi-  
535 viduals and their care-providing network.

---

536

537 The variation in the care offered to these individuals is, at the moment, vast. These individuals  
538 are critically ill with mortality from suicide of approximately 10%, which is 50 times higher  
539 than in non-clinical populations (Lieb, Zanarini, Schmahl, Linehan & Bohus, 2004). Brief  
540 Admission(BA) has the potential to serve as a new strategy, offering brief and structured hos-  
541 pital admission with low risk of iatrogenic reinforcement of suicidal behaviour. A protocol for  
542 managing crises may reduce the stress that professionals responsible for therapeutic outcomes  
543 often experience, which has often unfortunately led to stigma of these individuals within the  
544 health and mental health care system (NICE, 2004). Reduced stress amongst attending mental  
545 health professionals may in turn result in better care, as well as a larger number of clinicians  
546 becoming willing to work with individuals with recurrent and prolonged risk for suicide and  
547 self-harm or a BPD diagnosis.

548

549 **Preliminary results**

550 None.

551

552 **Previous experience:**

553 Marjolein Helleman is a nurse and post-doctoral researcher from the Netherlands with exten-  
554 sive experience in working with BA. In the Netherlands BA is a well-established treatment  
555 intervention, with a history of 30 years. Among the other researchers are senior psychiatrists  
556 (Sofie Westling and Åsa Westrin) who both have experience in treating individuals with BPD  
557 at risk for self-harm and suicide. Sophie Liljedahl has a doctorate in clinical psychology based  
558 on a scientist-practitioner model, and has extensive clinical and research experience in the  
559 field. The few existing publications have not identified any risks or complications related to  
560 the intervention.

561

562 **Relevant security measures**

563 Participants will have access to the same care and security measures as before the interven-  
564 tion. No significant risks are expected or associated with the intervention thus no additional  
565 security measures are needed.

566

567 **Ethical considerations:**

568 Individuals with recurrent and prolonged self-harm behaviour represent a stigmatized group in  
569 health care (NICE, 2004). Lengthy and unstructured hospital admissions, which often occur  
570 in Sweden and many other countries outside of the Netherlands, have been observed to aggra-  
571 vate self-harming behaviour problems. Because individuals experiencing high emotional dis-  
572 tress are largely ignored unless self-harming or suicidal, self-harming and suicidal behaviours  
573 become unintentionally reinforced when they are attended to by ward staff. Other individuals  
574 tend to observe this relationship from each other when they are in a closely-shared environ-  
575 ment, such as an inpatient ward, and subsequently increase the frequency of their self-harming  
576 and suicidal behaviours. Ignoring these behaviours entirely has been described to be damag-  
577 ing and inhumane (Åkerman & Eriksson, 2011). For this reason, lengthy and unstructured  
578 hospitalizations are understood to be iatrogenic (Linehan, 1993). If BA proves to be a form of  
579 care that reinforces autonomy and responsibility for this group while avoiding the pitfalls of  
580 escalating self-harming and suicidal behaviour while in care, it could form a new model of  
581 hospital admission for this group of individuals, increasing coping skills, and providing the  
582 increased structure and care that these individuals periodically need (Helleman, Goossens,  
583 Kaasenbrood & van Achterberg, 2013).



584

585 Participation in this project is not expected to cause any physical or mental injury, pain or  
586 discomfort. During the intervention, the individual has access to their full regular treatment  
587 except when admitted to the BA. Once randomized to the BA condition, participants and have  
588 full control over whether they want to use the BA intervention. A fear that might arise in  
589 some healthcare providers is that BA could be misused. However, previous experiences from  
590 the Netherlands and Norway give no indication of this but rather the opposite (Koekkoek, van  
591 der Snoek, Oosterwijk & van Meijel, 2010; Støvind, Hanneborg, Ruud, 2012). Taken together,  
592 risks for the participants are no greater than treatment as usual, and the potential benefits are  
593 significant.

594

595

## References

596

597 Adler, M., Agestam, M., Bergman, L., Båve, U., Nordlund, S., Norring, C., Rosenqvist G.  
598 (2010). Retrieved at: <http://www1.psykiatristod.se/Global/Bilagor/CGI-S.pdf>

599

600 American Psychiatric Association (2013). *Diagnostic and statistical manual of mental*  
601 *disorders* (5<sup>th</sup> ed.). Washington, DC: Author.

602

603 Babor, T. F., Higgins-Biddle, J. C., Saunders, J. B. and Monteiro, M. G. (2001). *AUDIT The*  
604 *Alcohol Use Disorders Identification Test. Guidelines for Use in Primary Care* (2<sup>nd</sup>  
605 ed.). Geneva: World Health Organization

606

607 Bergman, H. & Källmén, H. (2002). Alcohol use among Swedes and a psychometric evalua-  
608 tion of the Alcohol Use Disorders Identification Test. *Alcohol & Alcoholism*, 37, 245-  
609 251.

610

611 Berman, A. H., Bergman, H., Palmstierna, T. and Schlyter, F. (2005) Evaluation of the Drug  
612 Use Disorders Identification Test (DUDIT) in criminal justice and detoxification set-  
613 tings and in a Swedish population sample. *European Addiction Research* 11, 22–31

614

615 Borckardt, J. J., Nash, M. R., Murphy, M. D., Moore, M., Shaw, D., O'Neil, P. (2008). Clini-  
616 cal practice as natural laboratory for psychotherapy research: a guide to case-based  
617 time-series analysis. *The American Psychologist*, 63, 77-95.

618

619 Cohen, J. (1988). *Statistical power analysis for the behavioral sciences* (2nd ed.). Hillsdale,  
620 NJ: Lawrence Earlbaum Associates.

621

622 Carver, C. S. (1997). You want to measure coping but your protocol's too long:  
623 Consider the brief COPE. *International Journal of Behavioral Medicine*, 4, 92-100.

624

625 Glenn, C. R. & Klonsky, E. D. (2011). One-year test-retest reliability of the Inventory of Statements  
626 about Self-Injury (ISAS). *Assessment*, 18, 375-378.

627

628 Gratz, K. L. & Roemer, L. (2004). Multidimensional assessment of emotion regulation an  
629 dysregulation: Development, factor structure, and initial validation of the Difficulties  
630 in Emotion Regulation Scale. *Journal of Psychopathology and Behavioral Assessment*,  
631 26, 41-54.



- 
- 632
- 633 Faul, F., Erdfelder, E., Lang, A.-G., & Buchner, A. (2007). G\*Power 3: A flexible statistical  
634 power analysis program for the social, behavioral, and biomedical sciences. *Behavior*  
635 *Research Methods*,*39*, 175-191.
- 636
- 637 First, M.,B., Gibbon, M., Spitzer, R.L., Williams, J. B.W.. Benjamin, L.S. (1998). *SCID II,*  
638 *Structured Clinical Interview for DSM-IV-Axis II Disorders*. Danderyd: Pilgrim Press.
- 639
- 640 Friberg, Å. (2006). Känslig för känslor?: En kvantitativ studie av ett  
641 känsloregleringsperspektiv på oro och Generaliserat ångestsyndrom. *Unpublished*  
642 *Manuscript*. Stockholm. Department of Psychology. Retrieved from [http://www.diva-](http://www.diva-portal.org/smash/get/diva2:189373/FULLTEXT01.pdf)  
643 [portal.org/smash/get/diva2:189373/FULLTEXT01.pdf](http://www.diva-portal.org/smash/get/diva2:189373/FULLTEXT01.pdf)
- 644
- 645 Guy, W. (1976). The Clinical Global Impression Scale. In: ECDEU Assessment Manual for  
646 Psychopharmacology-Revised. Rockville, MD: US Dept. of Health, Education and  
647 Welfare, ADAMHA, MIMH Psychopharmacology Research Branch, pp 218-222.
- 648
- 649 Helleman, M., Goossens, P. J. J., Kaasensbrood, A., & van Achterberg, T. (2014).  
650 Experiences of patients with borderline personality disorder with the brief admission  
651 intervention: A phenomenological study. *International Journal of Mental Health Nurs-*  
652 *ing*.
- 653
- 654 Helleman, M., Goossens, P. J. J., Kaaseenbrood, A., & van Achterberg, T. (2013). Evidence  
655 base and components of brief admission as an intervention for patients with borderline  
656 personality disorder: A review of the literature. *Perspectives in Psychiatric Care*, *50*,  
657 65-75, doi: 10.1111/ppc.12023
- 658
- 659 Holmqvist, M. & Nylander, L. (2013a) “5 frågor”. *Unpublished manuscript*. Lund: Sweden
- 660
- 661 Holmqvist, M. & Nylander, L. (2013b) Angående screening formuläret “5 frågor”.  
662 *Unpublished manuscript*. Lund: Sweden
- 663
- 664 Kessler, R.C., Adler, L., Ames, M., Demler, O., Faraone, S., Hiripi, E., Howes, M.J., Jin, R.,  
665 Secnik, K., Spencer, T., Ustun, T.B., Walters, E.E. (2005).The World Health Organiza-  
666 tion Adult ADHD Self-Report Scale (ASRS): a short screening scale for use in the gen-  
667 eral population. *Psychological Medicine* *35*, 245–256.
- 668
- 669 Klonsky, E. D., & Glenn, C. R. (2009). Assessing the functions of non-suicidal self-injury:  
670 Psychometric properties of the inventory of statements about self-injury (ISAS). *Journal of*  
671 *Psychopathology and Behavioral Assessment*, *31*, 215-219.
- 672
- 673 Koekkoek, B., van der Snoek, R., Oosterwijk, K., van Meijel, B. (2010). Preventive  
674 psychiatric admission for patients with borderline personality disorder: a pilot study.  
675 *Perspectives in psychiatric care*, *46*,127-34
-

676

677 Lecrubier, Y., Sheehan, D., Weiller, E., Amorim, P., Bonora, I., Sheehan, K., Janavs, J. &  
678 Dunbar, G. (1997) The M.I.N.I. International Neuropsychiatric Interview (M.I.N.I.) A  
679 Short Diagnostic Structured Interview: Reliability and Validity According to the CIDI.  
680 *European Psychiatry* 12, 224-231.

681

682 Lieb, K., Zanarini, M. C., Schmahl, C., Linehan, M. M. & Bohus, M. (2004). Borderline  
683 personality disorder. *The Lancet*, 364, 453-461.

684

685 Liljedahl, S. I., Helleman, M., Daukantaitė, D., & Westling, S. (2017).  
686 Brief Admission: Manual for training and implementation developed from  
687 the Brief Admission Sk.ne Randomized Controlled Trial (BASRCT). Lund,  
688 Sweden: Media-Tryck, Lund University.

689

690 Liljedahl S, Westling S: A unified theoretical framework for understanding suicidal and self-  
691 harming behavior: Synthesis of diverging definitions and perspectives. Presented at  
692 the 3rd International Conference on Borderline Personality Disorder and Allied Disor-  
693 ders. Rome, Italy; 2014.

694

695 Lindholm, T., Bjärehed, J., & Lundh, L.-G. (2011). Functions of Nonsuicidal Self-Injury  
696 among Young Women in Residential Care: A Pilot Study with the Swedish Version of  
697 the Inventory of Statements about Self-Injury. *Cognitive Behaviour Therapy*, 40, 183-  
698 189.

699

700 Linehan, M. M. (1993). *Cognitive behavioral therapy of borderline personality disorder*. New  
701 York, NY: Guilford Press.

702

703 Lundh, L-G., (2014). Behandling vid icke-suicidalt självskadebeteende kräver tydlig struktur.  
704 Randomiserade kontrollerade studier visar evidens för DBT och MBT.  
705 *Läkartidningen 111: CH9E*

706

707

708 Lundh, L-G., (2013). *Behandlingseffekter på självskadebeteende: Vad visar forskningen?*  
709 Retrieved from:

710 [http://www.nationellasjalvskadeprojektet.se/download/18.3f4c6c4a13e6133832c137b/137162](http://www.nationellasjalvskadeprojektet.se/download/18.3f4c6c4a13e6133832c137b/1371623590809/Lundh+Forsknings%C3%B6versikt+behandling+sj%C3%A4lvskadebeteende+%282%29.pdf)  
711 [3590809/Lundh+Forsknings%C3%B6versikt+behandling+sj%C3%A4lvskadebeteende+%28](http://www.nationellasjalvskadeprojektet.se/download/18.3f4c6c4a13e6133832c137b/1371623590809/Lundh+Forsknings%C3%B6versikt+behandling+sj%C3%A4lvskadebeteende+%282%29.pdf)  
712 [2%29.pdf](http://www.nationellasjalvskadeprojektet.se/download/18.3f4c6c4a13e6133832c137b/1371623590809/Lundh+Forsknings%C3%B6versikt+behandling+sj%C3%A4lvskadebeteende+%282%29.pdf)

713

714 Nadort, M., Arntz, A., Smit, J.H., Giesen-Bloo, J., Eikelenboom, M., Spinhoven, P., van  
715 Asselt, T., Wensing, M. & van Dyck, R. (2009). Implementation of outpatient schema  
716 therapy for borderline personality disorder: study design. *BMC Psychiatry* 9, 64

717

718 NICE, (2009). Borderline personality disorder: Treatment and Management. NICE clinical  
719 guideline 78. Retrieved from:

720 <http://www.nice.org.uk/nicemedia/live/12125/42900/42900.pdf>

721

- 722 NICE, (2004). *Self-Harm: the Short-Term Physical and Psychological Management and Sec*  
723 *ondary Prevention of Self-Harm in Primary and Secondary Care*. NICE clinical guide  
724 line 16. Retrieved from:  
725 [http://publications.nice.org.uk/self-harm-cg16/guidance#issues-for-all-services-and-](http://publications.nice.org.uk/self-harm-cg16/guidance#issues-for-all-services-and-healthcare-professionals)  
726 [healthcare-professionals](http://publications.nice.org.uk/self-harm-cg16/guidance#issues-for-all-services-and-healthcare-professionals)
- 727
- 728 Odelius, C. & Ramklint, M. (2014). En nationell kartläggning av förekomsten av  
729 självskadande beteende hos patienter inom barn & ungdoms- och vuxenpsykiatri.  
730 Nationella Självskadeprojektet och Uppsala Universitet. Retrieved at  
731 [http://www.nationellasjalvskadeprojektet.se/download/18.1344ba471455d53fa1b559/139772](http://www.nationellasjalvskadeprojektet.se/download/18.1344ba471455d53fa1b559/1397728643998/Slutrapport+prevalensmätning+140410.pdf)  
732 [8643998/Slutrapport+prevalensmätning+140410.pdf](http://www.nationellasjalvskadeprojektet.se/download/18.1344ba471455d53fa1b559/1397728643998/Slutrapport+prevalensmätning+140410.pdf)
- 733
- 734 Saunders, J. B., Aasland, O.G., Babor, T. F., Delafuente, J.R., Grant, M. (1993) Devel-  
735 opment of the alcohol-use disorders identification test (AUDIT) - WHO collabo-  
736 rative project on early detection of persons with harmful alcohol-consumption-II.  
737 *Addiction* 88, 791–804
- 738
- 739 Sheehan, D.V., Lecrubier, Y., Harnett-Sheehan, K., Amorim, P., Janavs, J., Weiller, E.,  
740 Hergueta, T., Baker, R. & Dunbar, G. (1998). The M.I.N.I. International  
741 Neuropsychiatric Interview (M.I.N.I.): The Development and Validation of a Struc-  
742 tured Diagnostic Psychiatric Interview. *Journal of Clinical Psychiatry* 59 (suppl  
743 20):22-33.
- 744
- 745 Sheehan, D.V., Lecrubier, Y., Harnett-Sheehan, K., Janavs, J., Weiller, E., Bonara, L.I.,  
746 Keskiner, A., Schinka, J., Knapp, E., Sheehan, M.F. & Dunbar, G.C. (1997) Reliabil-  
747 ity and Validity of the M.I.N.I. International Neuropsychiatric Interview (M.I.N.I.):  
748 According to the SCID-P. *European Psychiatry* 12, 232-241.
- 749
- 750 Socialstyrelsen. (2013). *Satisfaction with social welfare services – A review*. Stockholm:  
751 Socialstyrelsen.
- 752 Socialstyrelsen (2013). Skador och förgiftningar behandlade i slutenvård 2012. Retrieved  
753 from: <http://www.socialstyrelsen.se/publikationer2013/2013-10-22>
- 754
- 755 Stoffers, J. M., Völlm, B. A., Rücker, G., Timmer A., Huband, N., Lieb, K.  
756 (2012). Psychological therapies for people with borderline personality disorder.  
757 *The Cochrane database of systematic reviews* 15,8
- 758
- 759 Støvind, H., Hanneborg, E.M., Ruud, T. (2012). Bedre tid med brukerstyrte inleggelse?  
760 *Sykepleien*. 100, 62-4.
- 761
- 762 World Health Organization (WHO: 2014). *World health organization disability assessment*  
763 *schedule II* (WHODAS 2.0.): Retrieved from:  
764 <http://www.who.int/classifications/icf/whodasii/en/>
- 765
- 766 Åkerman, S. & Eriksson, T. (2011). *Slutstation rättspsykiatri: om tvångsvårdade kvinnor som inte*  
767 *dömts för brott*. Stockholm: Natur och Kultur
- 768
