# Supplementary material for: Effect of Brief Admission to Hospital by Self-referral for Individuals Who Self-harm and Are at Risk of Suicide: A Randomized Clinical Trial
Source: PubMed Central journal article supplement (PMC6563573; doi:10.1001/jamanetworkopen.2019.5463), 2019-06-07
Supplement: jamanetwopen-2-e195463-s003.pdf [file jamanetwopen-2-e195463-s003.pdf]

## Data Sharing Statement

Westling. Effect of Brief Admission to Hospital by Self-referral for Individuals Who Self-harm and Are at Risk of Suicide. *JAMA Netw Open*. Published June 07, 2019. 10.1001/jamanetworkopen.2019.5463

### Data

**Data available:** No

### Additional Information

**Explanation for why data not available:** In our approval from the regional ethical review board, it is stated that data should only be presented on a group level as these might contain sensitive information
